# Supplementary material
Source: PubMed Central journal article supplement (PMC10495921)
Supplement: jamapediatr-e233229-s001.pdf [file jamapediatr-e233229-s001.pdf]

## Supplementary Online Content

Woods-Hill CZ, Koontz DW, Colantuoni EA, et al; Bright STAR Authorship Group. Sustainability of the Bright STAR diagnostic stewardship program to reduce blood culture rates among critically ill children. *JAMA Pediatrics*. Published online September 11, 2023. doi:10.1001/jamapediatrics.2023.3229

**eTable 1.** Comparison of Program Level Activities in the Post-implementation vs Sustainability Period

**eTable 2.** Example Site CSAT Tool (Site Identifying Information Removed)

**eTable 3.** CSAT Tool Domains Addressed in Site Plans, Summarized by Site; and Examples of How Different Sites Proposed to Practically Accomplish That Task in the Sustainability Period

This supplementary material has been provided by the authors to give readers additional information about their work.

**eTable 1.** Comparison of Program Level Activities in the Post-implementation vs Sustainability Period

| <b>Task or activity</b>              | <b>Post-implementation period</b> | <b>Sustainability period</b>      |
|--------------------------------------|-----------------------------------|-----------------------------------|
| Coaching calls with individual sites | Monthly                           | None                              |
| Collaborative-wide calls             | Quarterly                         | None                              |
| Implementation surveys               | Semi-annually                     | None                              |
| Data sharing                         | Monthly                           | At close of sustainability period |

eTable 2. Example Site CSAT Tool (Site Identifying Information Removed)

## Bright STAR Sustainability Worksheet

Site:

Project Leads:

| Domain (examples)                                                                                      | Owner             | Frequency                                | Description                                                                     |
|--------------------------------------------------------------------------------------------------------|-------------------|------------------------------------------|---------------------------------------------------------------------------------|
| <b>Engaged Staff &amp; Leadership</b>                                                                  |                   |                                          |                                                                                 |
| Project Champions identified                                                                           | Primary PICU lead |                                          |                                                                                 |
| Core support team established                                                                          | PICU leads        | Quarterly                                |                                                                                 |
| <b>Engaged Stakeholders</b>                                                                            |                   |                                          |                                                                                 |
| Critical stakeholder groups – maintain existing relationships, partner with new stakeholders as needed | PICU lead         | Quarterly                                | Will review project with PICU QI committee – involves MD and RN PICU leadership |
| Presentations beyond the unit                                                                          |                   |                                          | Not currently planned                                                           |
| Incorporate stakeholder views                                                                          | PICU lead         | Quarterly                                | Will review project with PICU QI committee – involves MD and RN PICU leadership |
| <b>Organizational Readiness</b>                                                                        |                   |                                          |                                                                                 |
| Clinical support – buy-in for clinical approach; acceptance of clinical tool                           |                   |                                          | Completed with initial implementation                                           |
| Project Support – process for data collection, data review                                             | PICU leads        | Monthly data pull                        | Continue to use automated data pull for culture rate                            |
| <b>Workflow Integration</b>                                                                            |                   |                                          |                                                                                 |
| Clinical pathways, algorithm, order sets, etc.                                                         | Primary PICU lead |                                          | Attempt to have add to EHR                                                      |
| Standardized work process                                                                              |                   |                                          |                                                                                 |
| <b>Implementation &amp; Training</b>                                                                   |                   |                                          |                                                                                 |
| Educate new unit clinicians                                                                            | Primary PICU lead | qJuly for fellows, as needed for faculty | Will educate new fellow/faculty during orientation                              |
| Reeducate all unit clinicians                                                                          | Primary PICU lead | Quarterly                                | Will review quarterly at M and M with all staff                                 |
| Feedback on non-compliance to unit                                                                     | Primary PICU lead | Quarterly                                | Will review quarterly at M and M with all staff                                 |
| Feedback on safety surveillance                                                                        | Primary PICU lead | Quarterly                                | Will review quarterly at M and M with all staff                                 |
| <b>Monitoring &amp; Evaluation</b>                                                                     |                   |                                          |                                                                                 |
| Monthly BCX Rate                                                                                       | PICU leads        | Monthly                                  |                                                                                 |
| Safety auditing (review positive cultures)                                                             | PICU leads        | Quarterly                                | Will likely change to quarterly                                                 |

|                                                   |            |           |                                                                          |
|---------------------------------------------------|------------|-----------|--------------------------------------------------------------------------|
| Unit level compliance with tool                   | PICU leads |           | Will examine more closely if rates increase                              |
|                                                   |            |           |                                                                          |
| <b>Outcomes &amp; Effectiveness</b>               |            |           |                                                                          |
| Regular review of data                            | PICU leads | Quarterly |                                                                          |
| Adjustment to clinical tool or workflow as needed | PICU leads | Quarterly | Change based on quarterly data review or feedback from PICU QI committee |

CSAT: Sustaintool. Washington University in St Louis. Retrieved May 25, 2020, from <https://www.sustaintool.org/csat/>.

**eTable 3.** CSAT Tool Domains Addressed in Site Plans, Summarized by Site; and Examples of How Different Sites Proposed to Practically Accomplish That Task in the Sustainability Period

| <b>Domain</b>               | <b>Number of sites that addressed the domain in their CSAT</b> | <b>Examples of how sites practically addressed the domain</b>                                                             |
|-----------------------------|----------------------------------------------------------------|---------------------------------------------------------------------------------------------------------------------------|
| Engaged staff/leadership    | 11/14                                                          | Present at PICU divisional quality improvement committee meetings                                                         |
| Engaged stakeholders        | 10/14                                                          | Check-ins with PICU nursing leadership                                                                                    |
| Organizational readiness    | 10/14                                                          | Maintain support for dashboard or automated data reporting system in order to have easy access to blood culture rate data |
| Workflow integration        | 11/14                                                          | Continue to integrate Bright STAR guidance into sepsis huddle script                                                      |
| Implementation and training | 13/14                                                          | Include information about Bright STAR program during orientation for new trainees                                         |
| Monitoring and evaluation   | 12/14                                                          | Review blood culture rate data regularly                                                                                  |
| Outcomes and effectiveness  | 13/14                                                          | Revise clinical tool as needed based on feedback from PICU QI committee                                                   |
