# Supplementary material
Source: PubMed Central journal article supplement (PMC10495921)
Supplement: jamapediatr-e233229-s002.pdf [file jamapediatr-e233229-s002.pdf]

## Data Sharing Statement

Woods-Hill. Sustainability of the Bright STAR Diagnostic Stewardship Program to Reduce Blood Culture Rates Among Critically Ill Children. *JAMA Pediatr.* Published September 11, 2023. doi:10.1001/jamapediatrics.2023.3229

### Data

**Data available:** No

### Additional Information

**Explanation for why data not available:** Our data is only summary hospital-level data. Our data use agreements with participating sites do not cover sharing this data publicly so we are not able to make it public.
